# Supplementary material for: Enhanced Li storage performance of ordered mesoporous MoO2via tungsten doping
Source: Royal Society of Chemistry journal article supplement (doi:10.1039/c2nr12017h), 2012-01-01
Supplement: c2nr12017h.pdf [file c2nr12017h.pdf]

## Supporting information for

# Enhanced Li Storage Performance of Ordered Mesoporous MoO<sub>2</sub> via Tungsten Doping

Xiangpeng Fang,<sup>a</sup> Bingkun Guo,<sup>a</sup> Yifeng Shi,<sup>\*b</sup> Bin Li,<sup>b</sup> Chunxiu Hua,<sup>a</sup> Chaohua Yao,<sup>b</sup> Yichi Zhang,<sup>c</sup> Yong-Sheng Hu,<sup>\*a</sup> Zhaoxiang Wang,<sup>a</sup> Galen D. Stucky<sup>c</sup> and Liquan Chen<sup>a,d</sup>

<sup>a</sup> Beijing National Laboratory for Condensed Matter Physics, Institute of Physics, Chinese Academy of Sciences, Beijing 100080, China, Tel: +86 10 82649808, Fax: +86 10 82649046, Email: yshu@aphy.iphy.ac.cn

<sup>b</sup> College of Material, Chemistry and Chemical Engineering, Hangzhou Normal University, Hangzhou, Zhejiang 310036, China, Tel: +86 571 28862779, Fax: +86 571 28862779, Email: yfshi@hznu.edu.cn

<sup>c</sup> Department of Chemistry & Biochemistry, University of California, Santa Barbara, CA 93106, USA,

<sup>d</sup> School of Materials Science and Engineering, Chonnam National University, Gwangju, 500-757, Republic of Korea

## Experimental

Mesoporous W-doped MoO<sub>2</sub> was obtained using mesoporous silica KIT-6 as a hard template. PTA and PMA ( $W_{\text{PTA}}/(W_{\text{PMA}}+W_{\text{PTA}}) = 0.25$ ) were adopted as the tungsten and molybdenum sources respectively and filled into the mesopore of KIT-6 template. The prepared precursors@template composite was then heated up to 700 °C at a rate of 5 °C min<sup>-1</sup> in a mixed gas flow of 10% H<sub>2</sub> and 90% Ar. During this treatment, the PTA and PMA precursors decomposed and the tungsten and molybdenum atoms were reduced in-situ from 6+ to 4+, forming crystalline dioxide product inside the mesopore of the KIT-6 template. Mesoporous silica template was removed using 4 wt% HF as etchant, and highly ordered mesoporous crystalline W-doped MoO<sub>2</sub> was collected as the final product. Meanwhile, for comparison, mesoporous MoO<sub>2</sub> was synthesized in the same way which has been reported in our earlier paper.

**Chemicals:** Triblock poly (ethylene oxide)-*b*-poly (propylene oxide)-*b*-poly (ethylene oxide) copolymer Pluronic P123 ( $M_w = 5800$ , EO<sub>20</sub>PO<sub>70</sub>EO<sub>20</sub>), n-butanol, tetraethyl orthosilicate (TEOS), phosphotungstic acid H<sub>3</sub>PW<sub>12</sub>O<sub>40</sub>•xH<sub>2</sub>O (PTA), phosphomolybdic acid H<sub>3</sub>PMo<sub>12</sub>O<sub>40</sub>•xH<sub>2</sub>O (PMA), hydrochloric acid (38 wt%) and hydrofluoric acid (48 wt%) were purchased from Aldrich Chemical Inc.. Micro-sized WO<sub>2</sub> was obtained from Aldrich Chemical Inc. Premixed 10% hydrogen diluted with 90% argon gas were purchased from Praxair, Inc.. All chemicals were used as received without any further purification. Millipore water was used in all experiments.

**Synthesis of KIT-6 hard template material:** Mesoporous silica KIT-6 was prepared according to the literature report and used as the hard template in our synthesis: 23.5 g of triblock copolymer P123 was dissolved in the mixture of 850 mL of water and 38.0 mL of 38 wt.% HCl with stirring overnight to get a clear solution. The solution was heated to 35 °C and then 23.5 g of n-butanol was added. After 2 h stirring, 48.0 g of TEOS was poured in with rigorously stirring, and the mixture was kept at the same temperature for another 24 h. The above mixture was then transferred into a Teflon lined stainless steel autoclave and heated up to 110 °C for 2 days for hydrothermal treatment. The white solids were recovered by filtration and dried in a 65 °C oven. Thereafter, the products were calcined at 500 °C for 2 h with a heating rate of 1.5 °C min<sup>-1</sup> in air to remove the P123 surfactant.

**Synthesis of mesoporous W-doped MoO<sub>2</sub>:** 4.2 g of precursor, composed of PTA and PMA with weight ratio 25:75, was added into 20 mL of ethanol in an open crucible, leading to a homogenous clear yellow solution. 1.0 g of mesoporous silica KIT-6 hard template was then added into the solution under stirring at room temperature in a fume

hood. After ethanol solvent was evaporated up after about 5 - 8 h, the obtained yellow powders were loaded on a quartz boat and heated to 700 °C in a tube furnace at a rate of 5 °C min<sup>-1</sup> under 10% H<sub>2</sub>/90% Ar atmosphere (150 mL min<sup>-1</sup>) for a desired time. The obtained W-doped MoO<sub>2</sub>@KIT-6 composite was treated with 60 mL 4 wt% HF aqueous solution to remove the silica template.

**Synthesis of micro-sized MoO<sub>2</sub>:** 5 g of micro-sized MoO<sub>3</sub> without any mesoporous silica template was directly reduced to micro-sized MoO<sub>2</sub> by Ar-diluted H<sub>2</sub> gas flow at 600 °C for 5 h.

**Characterizations:** Powder X-ray diffraction (XRD) patterns were collected on a Scintag PADX diffractometer with Cu K $\alpha$  radiation (45 kV, 35 mA). Transmission electron microscopy (TEM) images were taken using a FEI Tecnai T20 Sphera electron microscope operating at 200 keV. Scanning electron microscopy (SEM) images were acquired on a FEI XL30 Sirion FEG Digital Scanning electron microscope. Nitrogen sorption isotherms were measured at 77 K on a Micromeritics Tristars 3000 analyzer (USA).

**Electrochemical performance:** Electrochemical experiments were carried out using home-made two-electrode cells. The working electrodes were prepared by mixing the active materials, carbon black and poly(vinylidene difluoride) (PVDF) at a weight ratio of 80:10:10. The slurry was pasted on pure Cu foil and dried under vacuum at 100 °C for 12 hours. A polypropylene film (Celgard 2300) was used as a separator. Pure lithium foil was used as a counter electrode. The electrolyte consisted of a solution of 1 M LiPF<sub>6</sub> in ethylene carbonate (EC)/dimethyl carbonate (DMC) (1:1 by volume) obtained from Ferro Corporation. The cells were assembled in an argon-filled glove box. Galvanostatic discharge-charge experiments were tested at a current rate of 0.1C in the voltage range of 0.01-3 V on a Land BT2000 battery test system (Wuhan, China).

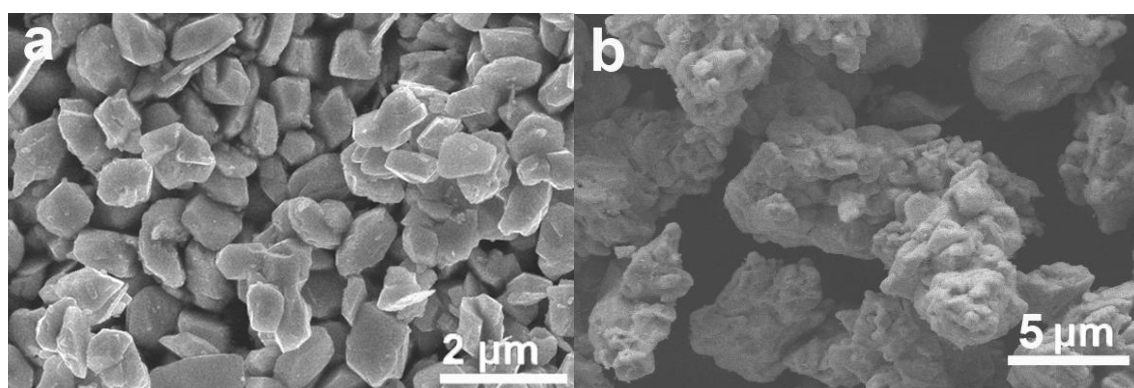

Fig. S1 SEM images of micron-sized MoO<sub>2</sub> (a) and micron-sized WO<sub>2</sub> (b).
